# Supplementary material for: Crystal structure and biochemical characterization of the recombinant ThBgl, a GH1 β-glucosidase overexpressed in Trichoderma harzianum under biomass degradation conditions
Source: Springer Nature journal article supplement (doi:10.1186/s13068-016-0487-0), 2016-03-22
Supplement: 13068_2016_487_MOESM1_ESM.pdf [file 13068_2016_487_MOESM1_ESM.pdf]

**Table S1.** GH1 and GH3  $\beta$ -glucosidases sequences identified on *T. harzianum* T6776 genome (GenBank access number [JOKZ00000000.1](#)) and used for mapping experiments via RNA-Seq data.

| <b>GenBank accession number</b>    | <b>Locus tag</b> | <b>Product name</b> | <b>Product length</b> |
|------------------------------------|------------------|---------------------|-----------------------|
| <i>Glycosyl hydrolase family 1</i> |                  |                     |                       |
| <a href="#">KKP02477.1</a>         | THAR02_05432     | beta-glucosidase    | 465 aa                |
| <a href="#">KKP05610.1</a>         | THAR02_02251     | beta-glucosidase    | 484 aa                |
| <a href="#">KKO98105.1</a>         | THAR02_09788     | beta-glucosidase    | 622 aa                |
| <a href="#">KKP06709.1</a>         | THAR02_01198     | beta-glucosidase A  | 642 aa                |
| <i>Glycosyl hydrolase family 3</i> |                  |                     |                       |
| <a href="#">KKO97043.1</a>         | THAR02_10851     | beta-glucosidase    | 781 aa                |
| <a href="#">KKO97705.1</a>         | THAR02_10190     | beta-glucosidase    | 835 aa                |
| <a href="#">KKP07226.1</a>         | THAR02_00656     | beta-glucosidase    | 770 aa                |
| <a href="#">KKP00605.1</a>         | THAR02_07292     | beta-glucosidase    | 882 aa                |
| <a href="#">KKP05725.1</a>         | THAR02_02189     | beta-glucosidase    | 767 aa                |
| <a href="#">KKP04308.1</a>         | THAR02_03585     | beta-glucosidase K  | 839 aa                |
