# Supplementary material for: Crystal structure and biochemical characterization of the recombinant ThBgl, a GH1 β-glucosidase overexpressed in Trichoderma harzianum under biomass degradation conditions
Source: Springer Nature journal article supplement (doi:10.1186/s13068-016-0487-0), 2016-03-22
Supplement: 13068_2016_487_MOESM2_ESM.pdf [file 13068_2016_487_MOESM2_ESM.pdf]

**Table S2.** Percent identity matrix between the GH1  $\beta$ -glucosidases amino acid sequences.

The multiple sequence alignment was performed using the Clustal Omega server

(<http://www.ebi.ac.uk/Tools/msa/clustalo/>).

|                   | <b>KU201604</b> | <b>KKP02477.1</b> | <b>KKP05610.</b> | <b>KKO98105.1</b> | <b>KKP06709.1</b> |
|-------------------|-----------------|-------------------|------------------|-------------------|-------------------|
| <b>KU201604</b>   | <b>100.00</b>   | 99.57             | 53.78            | 31.04             | 29.02             |
| <b>KKP02477.1</b> | 99.57           | <b>100.00</b>     | 53.78            | 31.28             | 29.02             |
| <b>KKP05610.1</b> | 53.78           | 53.78             | <b>100.00</b>    | 30.86             | 27.46             |
| <b>KKO98105.1</b> | 31.04           | 31.28             | 30.86            | <b>100.00</b>     | 50.16             |
| <b>KKP06709.1</b> | 29.02           | 29.02             | 27.46            | 50.16             | <b>100.00</b>     |
