# Supplementary material for: Crystal structure and biochemical characterization of the recombinant ThBgl, a GH1 β-glucosidase overexpressed in Trichoderma harzianum under biomass degradation conditions
Source: Springer Nature journal article supplement (doi:10.1186/s13068-016-0487-0), 2016-03-22
Supplement: 13068_2016_487_MOESM3_ESM.pdf [file 13068_2016_487_MOESM3_ESM.pdf]

**Table S3.** Percent identity matrix between the GH3  $\beta$ -glucosidase. The multiple sequence alignment was performed using the Clustal Omega server (<http://www.ebi.ac.uk/Tools/msa/clustalo/>).

|                   | <b>KKP07226.1</b> | <b>KKO97705.1</b> | <b>KKP04308.1</b> | <b>KKP00605.1</b> | <b>KKO97043.1</b> | <b>KKP05725.1</b> |
|-------------------|-------------------|-------------------|-------------------|-------------------|-------------------|-------------------|
| <b>KKP07226.1</b> | <b>100.00</b>     | 30.05             | 28.88             | 25.15             | 23.96             | 25.30             |
| <b>KKO97705.1</b> | 30.05             | <b>100.00</b>     | 46.83             | 30.35             | 31.63             | 31.18             |
| <b>KKP04308.1</b> | 28.88             | 46.83             | <b>100.00</b>     | 26.44             | 28.61             | 27.58             |
| <b>KKP00605.1</b> | 25.15             | 30.35             | 26.44             | <b>100.00</b>     | 41.58             | 40.54             |
| <b>KKO97043.1</b> | 23.96             | 31.63             | 28.61             | 41.58             | <b>100.00</b>     | 50.00             |
| <b>KKP05725.1</b> | 25.30             | 31.18             | 27.58             | 40.54             | 50.00             | <b>100.00</b>     |
