# Supplementary material for: Crystal structure and biochemical characterization of the recombinant ThBgl, a GH1 β-glucosidase overexpressed in Trichoderma harzianum under biomass degradation conditions
Source: Springer Nature journal article supplement (doi:10.1186/s13068-016-0487-0), 2016-03-22
Supplement: 13068_2016_487_MOESM4_ESM.pdf [file 13068_2016_487_MOESM4_ESM.pdf]

**Table S4.** Data collection and refinement statistics.

|                              |                            |
|------------------------------|----------------------------|
| Wavelength (Å)               | 1.458                      |
| Resolution range (Å)         | 47.25 – 2.59 (2.69 – 2.59) |
| Space group                  | P 6 <sub>1</sub>           |
| Unit cell parameters (Å)     | a = b = 218.24, c = 84.67  |
| Total reflections            | 599,938 (42,039)*          |
| Unique reflections           | 70,851 (6,926)             |
| Multiplicity                 | 8.5 (6.1)                  |
| Completeness (%)             | 99.79 (98.54)              |
| Mean I/sigma (I)             | 9.83 (2.00)                |
| Wilson B-factor              | 30.63                      |
| R-merge                      | 0.234 (0.908)              |
| R-meas                       | 0.249                      |
| CC <sub>1/2</sub>            | 0.98 (0.68)                |
| CC*                          | 0.99 (0.89)                |
| R-work                       | 0.176 (0.268)              |
| R-free                       | 0.210 (0.317)              |
| Number of non-hydrogen atoms | 7,803                      |
| Macromolecules               | 7,604 (2 chains)           |
| Ligands                      | 38 (3 GOL / 4 SO4)         |
| Water                        | 161                        |
| Protein residues             | 942                        |
| RMS (bonds) (Å)              | 0.003                      |
| RMS (angles) (°)             | 0.70                       |
| Ramachandran favoured (%)    | 96                         |
| Ramachandran outliers (%)    | 0                          |
| Clashscore                   | 3.69                       |
| Average B-factor             | 37.30                      |
| Macromolecules               | 37.30                      |
| Ligands                      | 62.80                      |
| Solvent                      | 31.50                      |
| PDB accession code           | 5BWF                       |

\*Statistics for the highest-resolution shell are shown in parentheses.
